# Supplementary material
Source: MDPI journal article supplement (https://www.mdpi.com/search?q=nanomaterials-09-00772)

# Highly Hydrophilic Gold Nanoparticles as Carrier for Anticancer Copper(I) Complexes: Loading and Release Studies for Biomedical Applications

Ilaria Fratoddi <sup>1</sup>, Iole Venditti <sup>2\*</sup>, Chiara Battocchio <sup>2</sup>, Laura Carlini <sup>2</sup>, Simone Amatori <sup>1</sup>, Marina Porchia <sup>3\*</sup>, Francesco Tisato <sup>3</sup>, Federica Bondino <sup>4</sup>, Elena Magnano <sup>4</sup>, Maura Pellei <sup>5</sup> and Carlo Santini <sup>5</sup>

**Figure S1:** Uv-vis spectra of (a) complex A and (b) complex B; Calibration curves for complex A (c) and complex B (d). (The error bars are inserted but not appreciable).

(a)

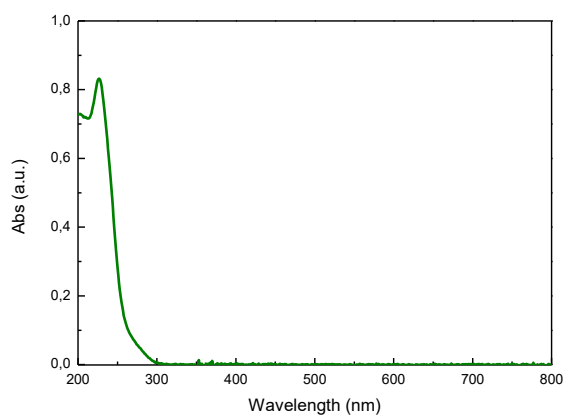

(b)

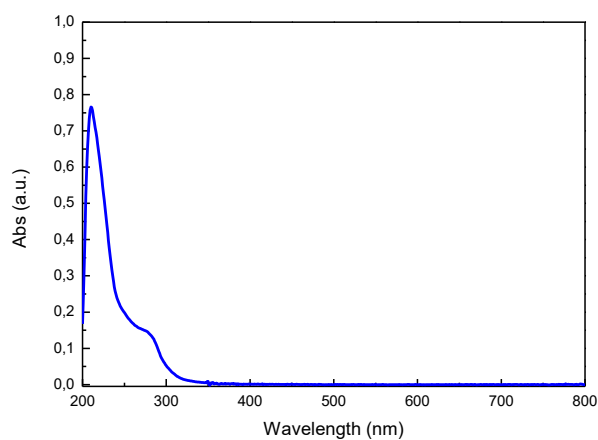

(c)

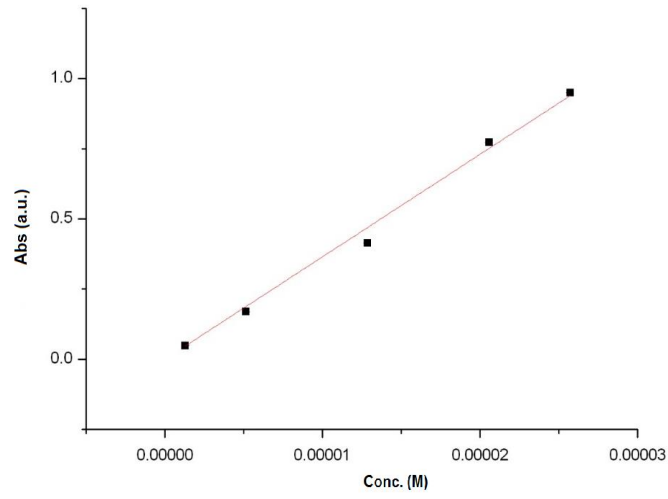

(d)

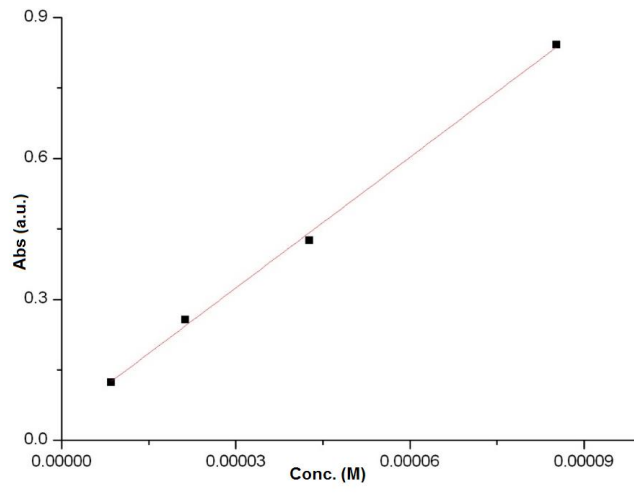

**Figure S2:** SEM-EDX analysis of AuNPs-A

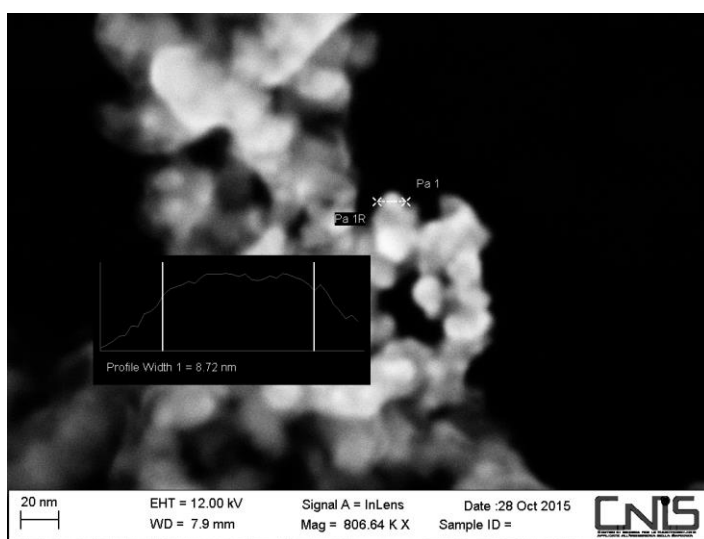

Elemental Microanalysis of AuNPs-A

| Spectrum | C    | Au    | Cu   | Tot    |
|----------|------|-------|------|--------|
| AuNPs-A  | 18.5 | 79.30 | 2.20 | 100.00 |

All result in weight %.

**Figure S3:** ATR data of conjugates systems: a) ATR spectra of complex **A** (red line) and AuNPs loaded with complex **A** (blue line); b) ATR spectra of complex **B** (pink line) and AuNPs loaded with complex **B** (green line).

a)

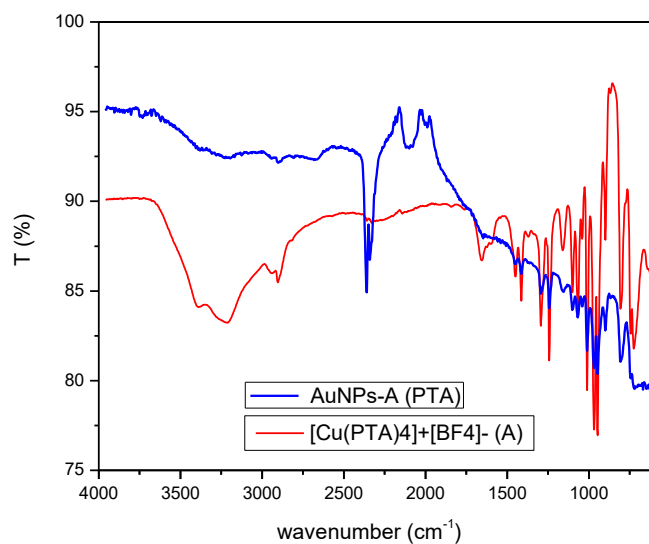

b)

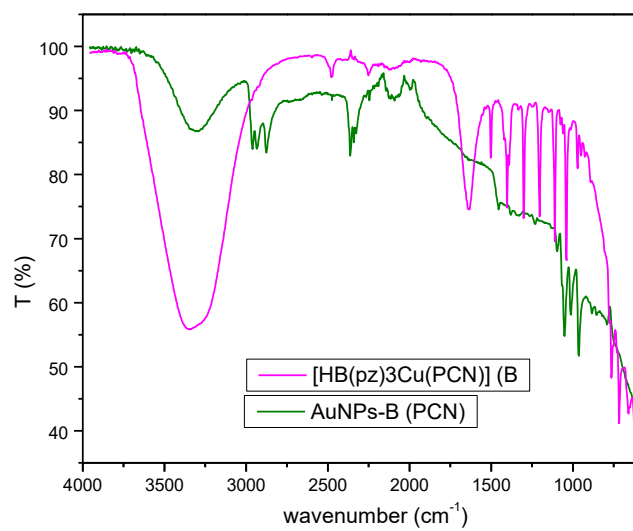

**Table S1.** C1s and P2p spectra data analysis BE, FWHM values and assignments for pristine Cu(I) complexes and AuNPs carriers

| <b>Table S1.</b> C1s and P2p BE, FWHM values and assignments for pristine Cu(I) complexes and AuNPs carriers. |         |           |                                      |
|---------------------------------------------------------------------------------------------------------------|---------|-----------|--------------------------------------|
| Sample                                                                                                        | BE (eV) | FWHM (eV) | Assignment                           |
| <b>A</b>                                                                                                      |         |           |                                      |
| C1s                                                                                                           | 285.50  | 1.04      | C-P                                  |
|                                                                                                               | 286.00  | 1.04      | C-N                                  |
| P2p                                                                                                           | 130.43  | 2.79      | P in organic compounds, not oxidized |
| <b>AuNP-A</b>                                                                                                 |         |           |                                      |
| C1s                                                                                                           | 285.00  | 0.59      | C-C                                  |
|                                                                                                               | 205.50  | 0.59      | C-P                                  |
|                                                                                                               | 286.00  | 0.59      | C-N                                  |
| P2p                                                                                                           | 131.11  | 1.71      | P in organic compounds, not oxidized |
| <b>B</b>                                                                                                      |         |           |                                      |
| C1s                                                                                                           | 285.00  | 1.04      | C-C                                  |
|                                                                                                               | 286.65  | 1.04      | C-P, C-N                             |
|                                                                                                               | 288.46  | 1.04      | PCN                                  |
|                                                                                                               | 290.94  | 1.04      | COO <sup>-</sup> impurities          |
| P2p                                                                                                           | 131.81  | 1.77      | P in organic compounds, not oxidized |
| <b>AuNP-B</b>                                                                                                 |         |           |                                      |
| C1s                                                                                                           | 285.00  | 1.04      | C-C                                  |
|                                                                                                               | 286.59  | 1.04      | C-P, C-N                             |
|                                                                                                               | 288.02  | 1.04      | PCN                                  |
|                                                                                                               | 288.98  | 1.04      | COO <sup>-</sup> impurities          |
| P2p                                                                                                           | 131.86  | 1.72      | P in organic compounds, not oxidized |

Figure S4: XPS P2p spectra, confirming the molecular structure stability of A and B complexes.

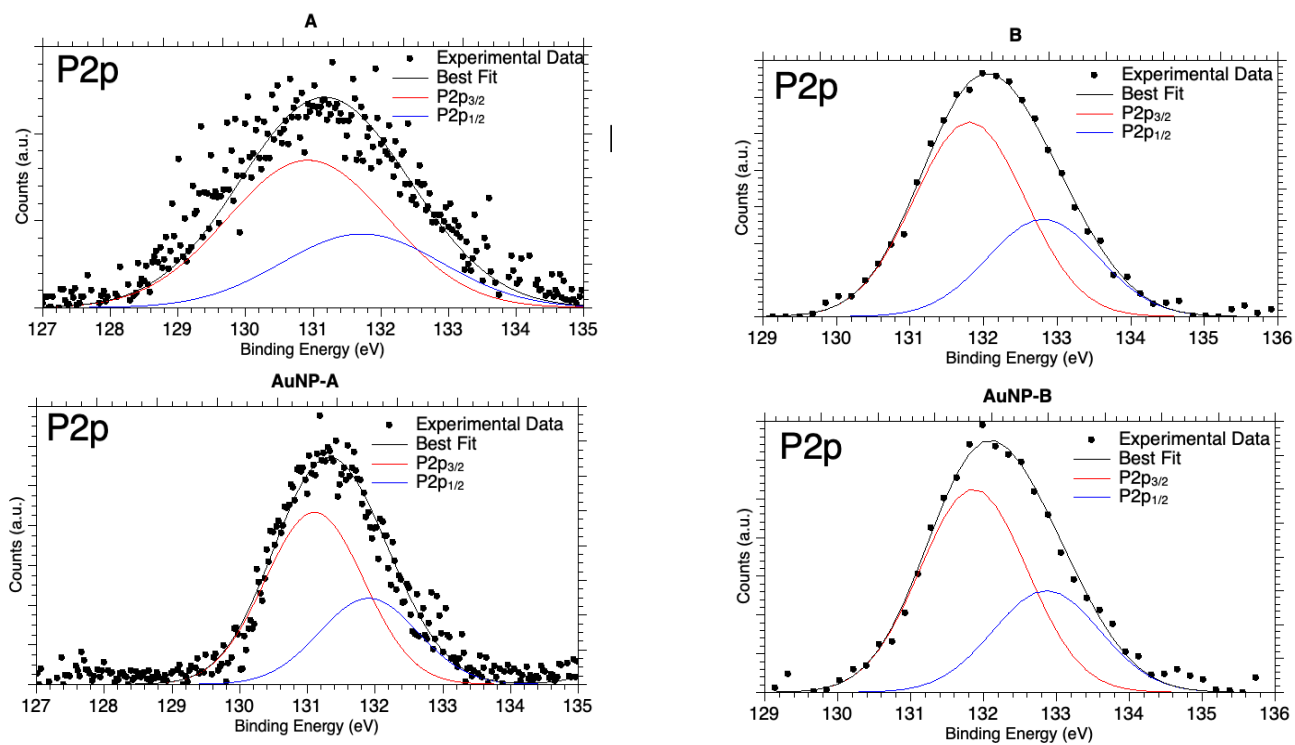

**Figure S5:** a) XPS Au4f spectrum of AuNP-A. b) Cu2p spectra of complex A and AuNP-A (rough data, confirming the stability of Cu(I) complex).

a)

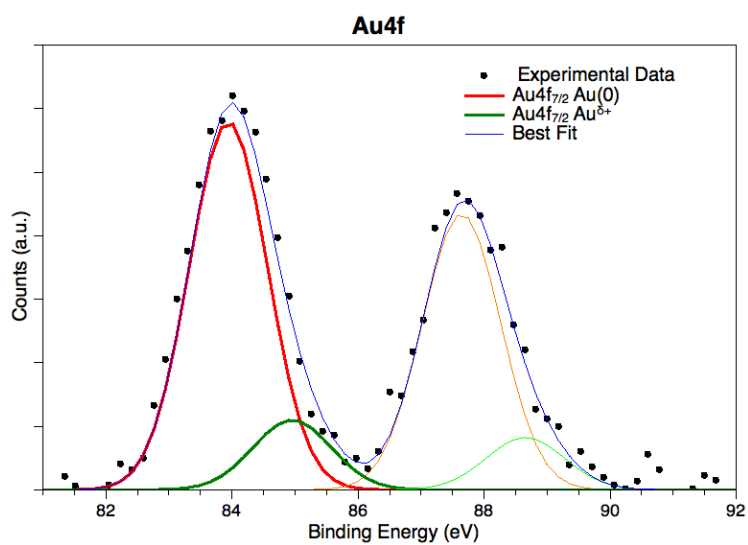

b)

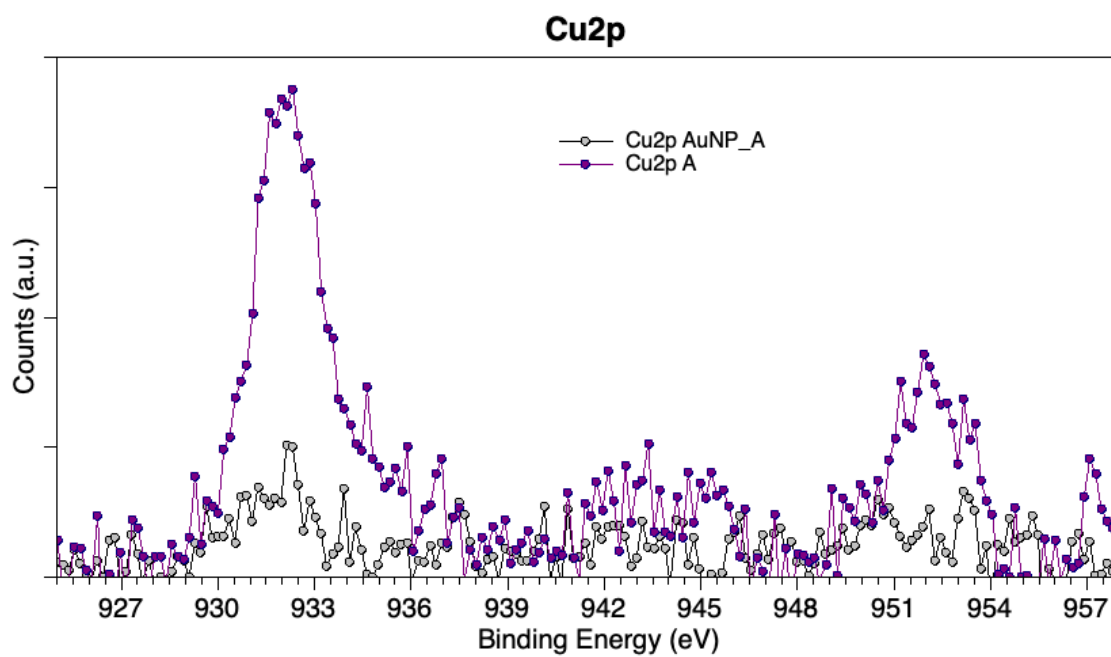

Supplement: s001 [file nanomaterials-09-00772-s001.pdf]
